# Supplementary material for: Structural analysis of cross-linked poly(vinyl alcohol) using high-field DNP-NMR
Source: PubMed Central journal article supplement (PMC9049923; doi:10.1039/d0ra00399a), 2020-02-24
Supplement: RA-010-D0RA00399A-s001.pdf [file RA-010-D0RA00399A-s001.pdf]

Electronic Supplementary Information  
**Structural analysis of cross-linked poly(vinyl alcohol)  
using high-field DNP-NMR**

Taiji Kanda,<sup>\*a,b</sup> Mayuka Kitawaki,<sup>a</sup> Toshiaki Arata,<sup>b</sup> Yoh Matsuki<sup>b</sup>, and  
Toshimichi Fujiwara<sup>b</sup>

<sup>a</sup> *Mitsubishi Chemical Corporation*

*2-13-1, Muroyama, Ibaraki, Osaka 567-0052, Japan*

<sup>b</sup> *Institute for Protein Research, Osaka University,*

*3-2, Yamadaoka, Suita, Osaka 565-0871, Japan*

Confirmation of reactive sites in the reaction between low molecular weight compounds, including acetoacetyl and hydrazide functional groups.

(The reaction of methyl acetoacetate and acetohydrazide)

Methyl acetoacetate was purchased from Fujifilm Wako Chemicals (Osaka, Japan) and Acetohydrazide was purchased from Tokyo Chemical Industry CO. Ltd. (Tokyo, Japan). These materials were used without further purification. Each material is shown in Fig. SI-1. A solution of 3.1 mg methyl acetoacetate (27  $\mu$ mol), 2.0 mg acetohydrazide (27  $\mu$ mol), and 40 ml of water was prepared at 23 °C. After stirring for 1 min, the solution was transferred to an NMR sample tube (the tube comprised a double tube). D<sub>2</sub>O was placed in the outer sample tube ( $\phi$  5 mm) while the reaction mixture was placed in the inner sample tube ( $\phi$  4 mm). After mixing for 1 hour, the structure was confirmed using solution NMR, according to the conditions tabulated in Table SI-1. The solution <sup>13</sup>C NMR spectrum of the product was shown in Fig.7.

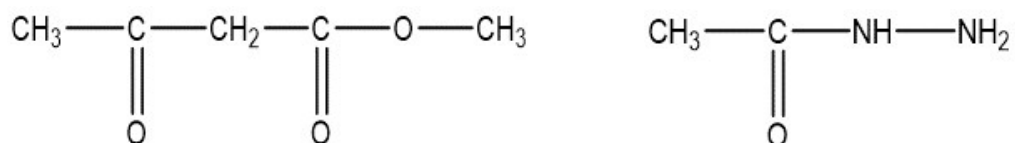

Fig. SI-1 Molecular structure of methyl acetoacetate (left) and acetohydrazide (right)

Table SI-1 Measurement conditions used for solution NMR

|                        |                                                                                                         |
|------------------------|---------------------------------------------------------------------------------------------------------|
| NMR                    | VARIAN UNITY-300                                                                                        |
| Probe                  | 5 mm $\phi$ , four-nucleus ( $^1\text{H}$ , $^{13}\text{C}$ , $^{19}\text{F}$ , $^{31}\text{P}$ ) probe |
| Pulse sequence         | Inverse gated decoupling                                                                                |
| Temperature            | 296 K                                                                                                   |
| Spinning rate          | 20 Hz                                                                                                   |
| Observe nucleus        | $^{13}\text{C}$                                                                                         |
| 90°degree pulse width  | 10 $\mu\text{s}$                                                                                        |
| Decoupling nucleus     | $^1\text{H}$                                                                                            |
| Decoupling sequence    | Waltz16                                                                                                 |
| Number of acquisitions | 1024                                                                                                    |
